# Supplementary material for: Valence-induced assembly of CuI–CuII ions into different discrete coordination architectures by a disk-shaped polypyridyl ligand
Source: Royal Society of Chemistry journal article supplement (doi:10.1039/c2dt00002d), 2012-01-01
Supplement: c2dt00002d.pdf [file c2dt00002d.pdf]

## **Electronic Supplementary Information (ESI)**

### **Valence-induced assembly of Cu<sup>I</sup>/Cu<sup>II</sup> ions into different discrete coordination architectures by a disk-shaped polypyridyl ligand**

**Qiang Zhao, Xiu-Ming Liu, Wei-Chao Song, and Xian-He Bu\***

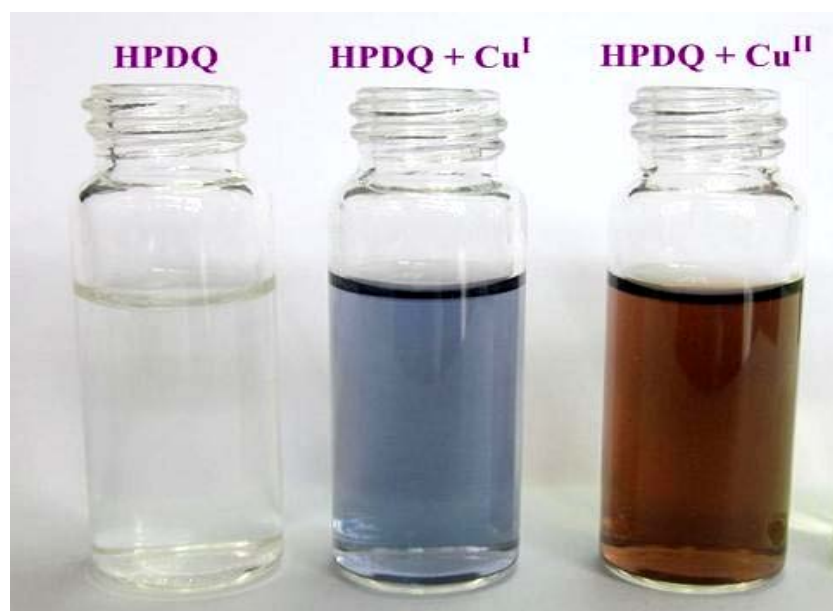

**Fig. S1** Color changes of HPDQ upon addition of Cu<sup>I</sup> or Cu<sup>II</sup>.

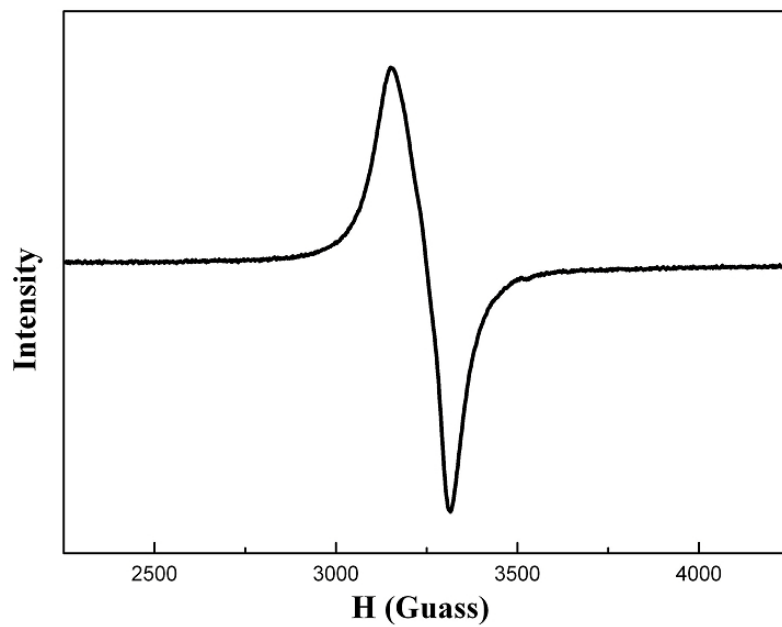

**Fig. S2** EPR spectra at room temperature for complex  $(\text{Cu}(\text{NO}_3)_2)_6(\text{HPDQ})_3$  (1) in the  $\text{CH}_2\text{Cl}_2/\text{CH}_3\text{CN}$  (v/v = 1:1) mixture solvent.

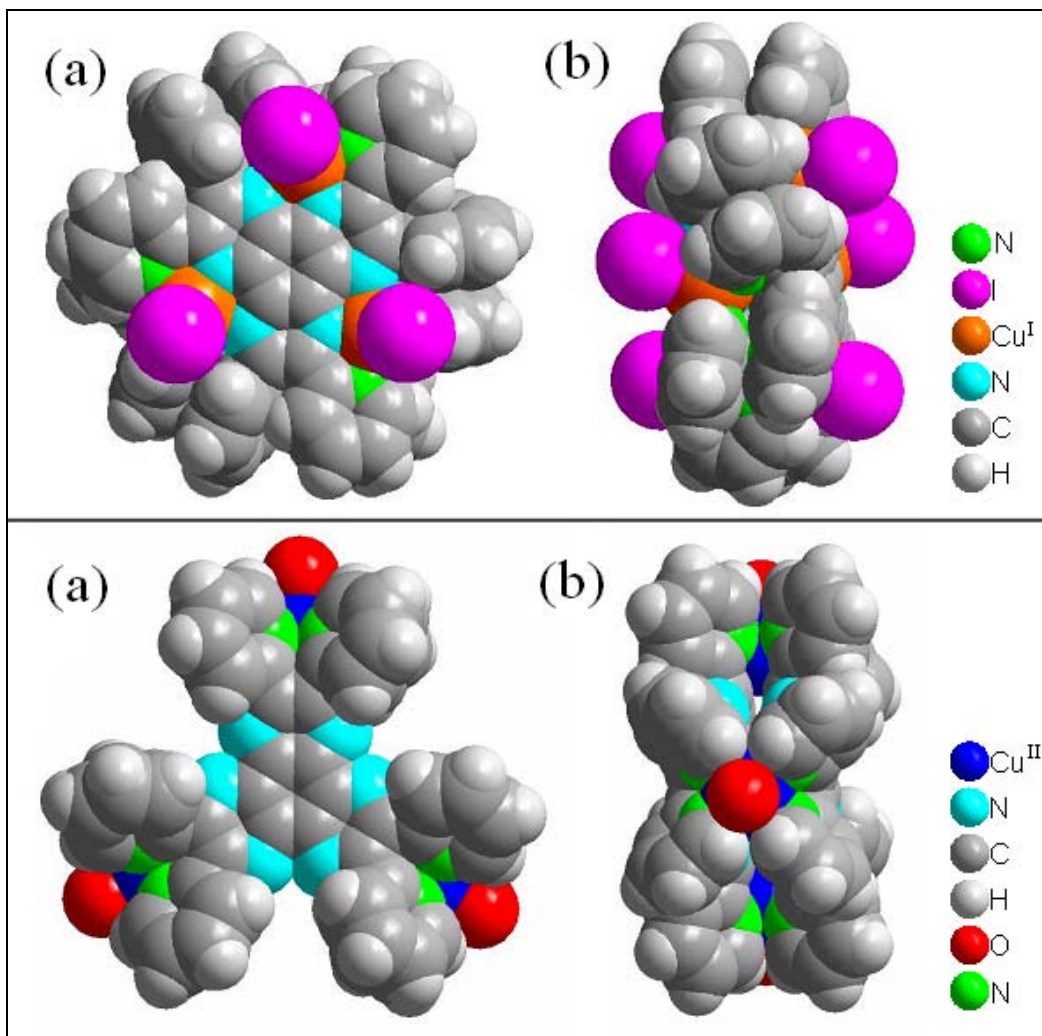

**Fig. S3** Space-filling diagrams showing the crystal structure of  $(\text{CuI})_6(\text{HPDQ})_2(\text{CHCl}_3)_8$  (1) and  $(\text{Cu}(\text{NO}_3)_2)_6(\text{HPDQ})_3$  (2). (a) top view; (b) side view.

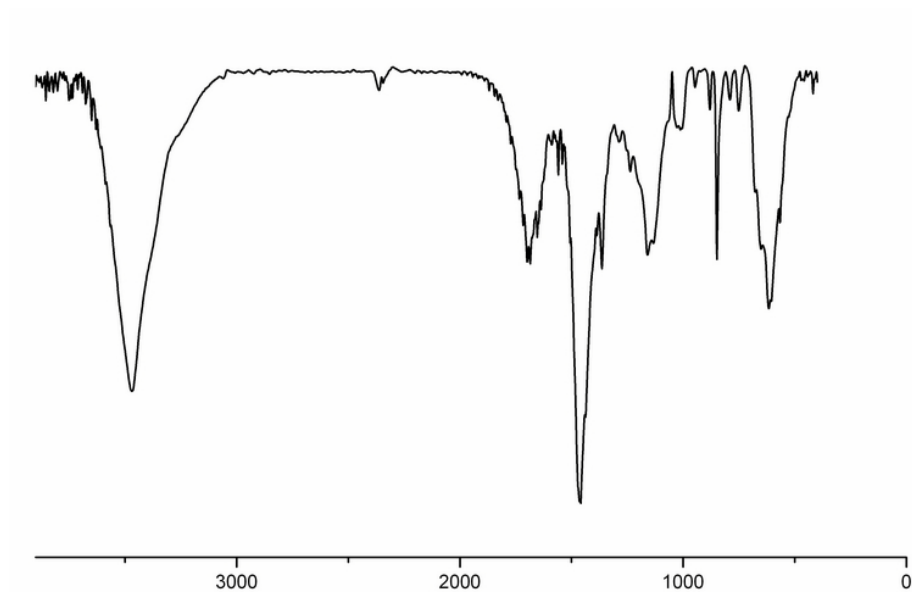

**Fig. S4** FT-IR spectra of  $(\text{CuI})_6(\text{HPDQ})_2(\text{CHCl}_3)_8$  (1)

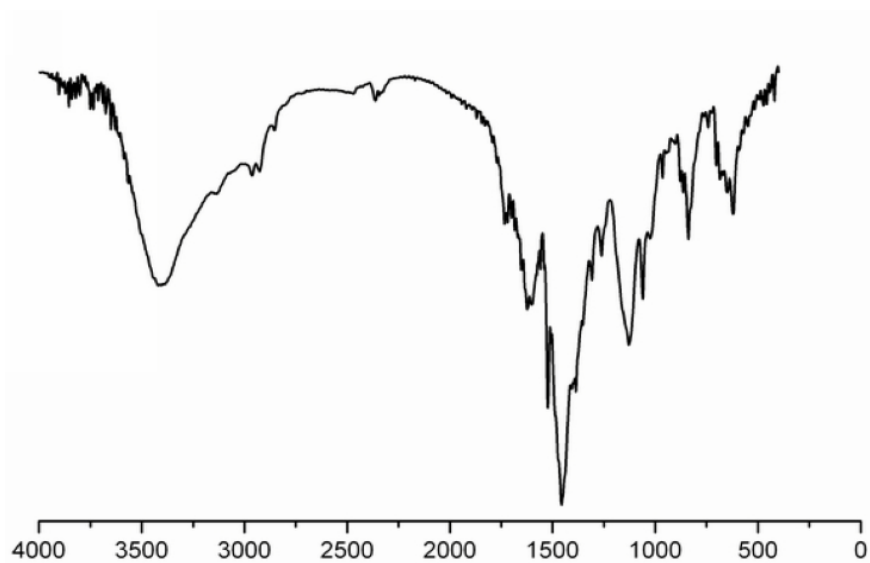

**Fig. S5** FT-IR spectra of  $(\text{Cu}(\text{NO}_3)_2)_6(\text{HPDQ})_3$  (2)
